# Supplementary material
Source: HighWire-hosted journal article supplement (https://www.qdcxjkg.com/highwire/filestream/114423/field_highwire_adjunct_files/0/ERJ_01693-2013_Akkermans.pdf)
Supplement: ERJ_01693-2013_Akkermans.pdf [file ERJ_01693-2013_Akkermans.pdf]

Waarschuwing: dit formulier wordt niet ondersteund in de huidige versie van Acrobat of Adobe Reader.  
Installeer de nieuwste versie voor volledige ondersteuning.
